# Supplementary material
Source: PubMed Central journal article supplement (PMC7648786)
Supplement: 41419_2020_3151_MOESM1_ESM.pdf [file 41419_2020_3151_MOESM1_ESM.pdf]

1 **SUPPLEMENTARY MATERIALS**

2  
3  
4 **Supplementary Materials Legends**

5  
6 Figure 1S

7 **HT- cytokines**

8 Correlation analysis of analytes and HT measured by Person coefficient r (95% confidence interval)  
9 and two-tailed p-value analysis (indicated inside the square).

10  
11 Figure 2S

12 **Age- cytokines**

13 Correlation analysis of analytes and age measured by Person coefficient r (95% confidence interval)  
14 and two-tailed p-value analysis (indicated inside the square).

15  
16 Figure 3S

17 **DS- cytokines**

18 Correlation analysis of analytes and DS measured by Person coefficient r (95% confidence interval)  
19 and two-tailed p-value analysis (indicated inside the square).

20  
21 Figure 4S

22 **Immune cell population in age-matched Covid-19 patients**

23 Percentage of immune cell populations assessed by FACS analysis in healthy age-matched controls  
24 and COVID-19 patients (A), and in younger (<60) or older (>60) Covid-19 patients (B).

25  
26 Figure 5S

27 **Gating strategy for the identification of T cell subsets.**

28  
29 Figure 6S

30 **Gating strategy for the identification of T cell exhaustion.**

31  
32 Figure 7S

33 **Gating strategy for the identification of NK and B cells.**

34  
35 Figure 8S

36 **Gating strategy for the identification of myeloid cell subsets.**
